# Supplementary material
Source: Springer Nature journal article supplement (https://www.springermedizin.de/resource/supplementary/13256_2012_2578_MOESM6_ESM.pdf/9649986)

Cephalad

Hernia sac

Caudad

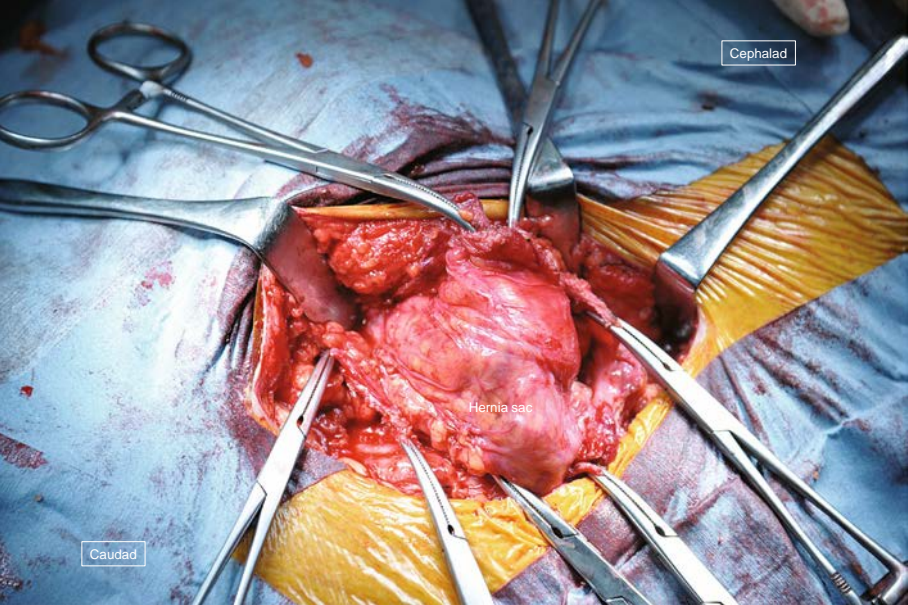

Supplement: MOESM6 [file 9649986]
